# Supplementary material for: Yellow fluorescent graphene quantum dots as a phosphor for white tunable light-emitting diodes
Source: Royal Society of Chemistry journal article supplement (doi:10.1039/c8ra10353d), 2019-01-01
Supplement: c8ra10353d1.pdf [file c8ra10353d1.pdf]

## Supporting Information

### Yellow fluorescence graphene quantum dots as phosphor for white tunable light emitting diodes

Luqiao Yin,<sup>†,§</sup> Jipeng Zhou,<sup>†,¶</sup> Weitao Li,<sup>‡</sup> Jianhua Zhang,<sup>\*,†,§</sup> and Liang Wang<sup>\*,‡</sup>

<sup>†</sup>Key Laboratory of Advanced Display and System Applications, Shanghai University, Ministry of Education, No.149 YanChang Road, JingAn District, Shanghai, 200072, P.R. China

<sup>‡</sup>Institute of Nanochemistry and Nanobiology, School of Environmental and Chemical Engineering, No.99 ShangDa Road, BaoShan District, Shanghai University, Shanghai 200444, P.R. China

<sup>§</sup>School of Mechatronics and Automation, Shanghai University, No.149 YanChang Road, JingAn District, Shanghai, 200072, P.R. China

<sup>¶</sup>School of Materials Science and Engineering, Shanghai University, No.99 ShangDa Road, BaoShan District, Shanghai, 200072, P.R. China

\*Correspondence: \*Tel.: +(86)-21-66135275, Fax: +(86)-21-66138025. \*E-mail: wangl@shu.edu.cn. \*E-mail: jhzhang@staff.shu.edu.cn.

#### Figure and Table List.

| Figure and Table | Page |
|------------------|------|
| Figure S1        | S2   |
| Figure S2        | S2   |
| Figure S3        | S2   |
| Table S1         | S3   |
| Table S2         | S3   |

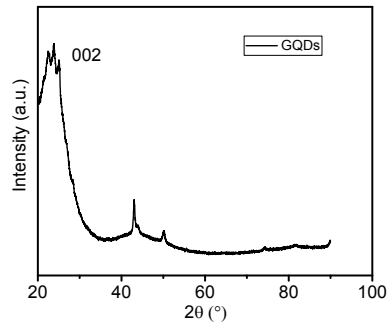

**Figure S1.** XRD spectrum of GQDs

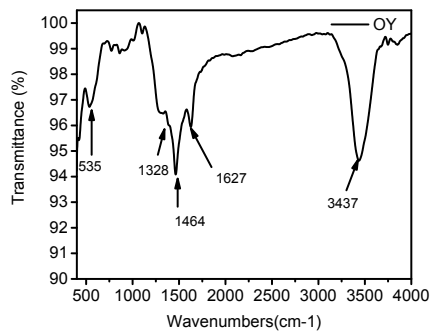

**Figure S2.** FT-IR spectra of the GQDs

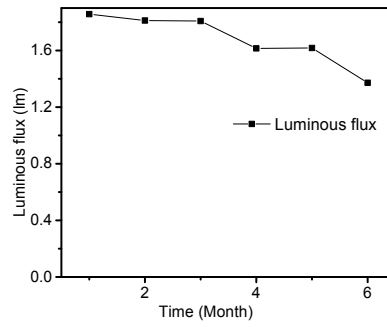

**Figure S3.** Luminous flux attenuation curve of devices stored in a drying cabinet

**Table S1.** Optimal performance record of white QDs LED fabricated with the quantum dissolved in different solvent during the entire experimental process.

| Solvent         | CRI  | Luminous Efficacy (Lm/W) | CCT (K) |
|-----------------|------|--------------------------|---------|
| Hexamethylene   | 79.6 | 10.53                    | 3870    |
| Toluene         | 85.5 | 34.79                    | 7191    |
| Ethylene glycol | 84   | 10.10                    | 7278    |
| Ethanol         | 86.7 | 7.86                     | 4710    |

**Table S2.** Main optical parameters of the various QD and QD-modified phosphor-converted WLEDs.

| Color converter        | QY of QDs(%)         | LE (lm W-1) | CCT (K) | Ra   | Working currents/<br>Operating Voltage | Ref.      |
|------------------------|----------------------|-------------|---------|------|----------------------------------------|-----------|
| GQDs                   | 31                   | 34.79       | 7191    | 85.5 | 20 mA                                  | This work |
| CNF@afGQDs             | /                    | 31.6        | /       | /    | 20 mA                                  | [52]      |
| GQD–agar composites    | 6.4                  | 42.2        | 5532    | 72.0 | 20 mA                                  | [53]      |
| Cl-GQDs                | 6.2                  | 8.6         | 4029    | 82.2 | 20 mA                                  | [54]      |
| AC-CDs                 | 29                   | 30.5        |         | 92   | 3.5 V                                  | [55]      |
| S,N-GQDs+YAG:C e3+     | 51.2                 | 19.9        | 7342    | 74.6 | 350 mA                                 | [56]      |
| CDs+Ce-PiG             | 25.8                 | 30.6        | 2561    | 92.6 | 20 mA                                  | [57]      |
| CD/PVA composite films | R 47<br>B 34<br>G 19 | 10.2        | 3919    | 91   | 3 V                                    | [58]      |
